# Supplementary material for: Genomic and Micro-Evolutionary Features of Mammalian 2 orthobornavirus (Variegated Squirrel Bornavirus 1, VSBV-1)
Source: MDPI journal article supplement (doi:10.3390/microorganisms9061141), 2021-05-25
Supplement: s1 [file s1]

**Supplemental Table S1.** Collection date, host and origin of VSBV-1 genomes used in the study.

| GenBank acc. no. | Year of detection | Host                    | Location  | Region            |
|------------------|-------------------|-------------------------|-----------|-------------------|
| KY488723         | 2016              | <i>C. prevostii</i>     | Holding E | Northwest Germany |
| KY488727         | 2016              | <i>T. swinhoei</i>      | Holding E | Northwest Germany |
| LT594388         | 2015              | <i>C. prevostii</i>     | Holding E | Northwest Germany |
| KY488724         | 2016              | <i>C. prevostii</i>     | Holding E | Northwest Germany |
| LT594381         | 2015              | <i>C. prevostii</i>     | Holding E | Northwest Germany |
| KY488726         | 2016              | <i>C. prevostii</i>     | Holding E | Northwest Germany |
| KY488722         | 2016              | <i>C. prevostii</i>     | Holding E | Northwest Germany |
| LT594387         | 2015              | <i>C. prevostii</i>     | Holding E | Northwest Germany |
| KY488725         | 2016              | <i>C. finlaysonii</i>   | Holding E | Northwest Germany |
| LT594384         | 2015              | <i>S. variegatoides</i> | Holding G | East Germany      |
| LT594389         | 2015              | <i>S. variegatoides</i> | Holding G | East Germany      |
| LT594390         | 2015              | <i>S. variegatoides</i> | Holding H | North Germany     |
| LT594385         | 2015              | <i>S. variegatoides</i> | Holding A | East Germany      |
| LT594382         | 2015              | <i>S. variegatoides</i> | Holding A | East Germany      |
| LN713680         | 2014              | <i>S. variegatoides</i> | Holding A | East Germany      |
| LT594391         | 2014              | <i>S. variegatoides</i> | Holding A | East Germany      |
| LN713681         | 2013              | <i>H. sapiens</i>       | Holding A | East Germany      |
| KY488728         | 2016              | <i>C. prevostii</i>     | Zoo K     | East Germany      |
| KY488729         | 2016              | <i>C. prevostii</i>     | Zoo D     | North Germany     |
| MF597762         | 2013              | <i>H. sapiens</i>       | Zoo D     | North Germany     |
| MN092363         | 2007              | <i>H. sapiens</i>       | Zoo D     | North Germany     |
| KY508799         | 2016              | <i>C. prevostii</i>     | Zoo J     | Southwest Germany |
| MW234349         | 2019              | <i>C. prevostii</i>     | Zoo J     | Southwest Germany |
| LT594383         | 2016              | <i>C. prevostii</i>     | Holding M | The Netherlands   |
| LT594386         | 2016              | <i>C. prevostii</i>     | Holding M | The Netherlands   |
| KY508798         | 2016              | <i>C. prevostii</i>     | Zoo L     | Southwest Germany |
